# Supplementary material for: Implications for blood-brain-barrier permeability, in vitro oxidative stress and neurotoxicity potential induced by mesoporous silica nanoparticles: effects of surface modification
Source: Royal Society of Chemistry journal article supplement (doi:10.1039/c5ra17517h), 2015-12-11
Supplement: c5ra17517h1.pdf [file c5ra17517h1.pdf]

**Implication for blood-brain barrier permeability, *in vitro* oxidative stress and neurotoxicity potential induced by mesoporous silica nanoparticles: effects of surface modification**

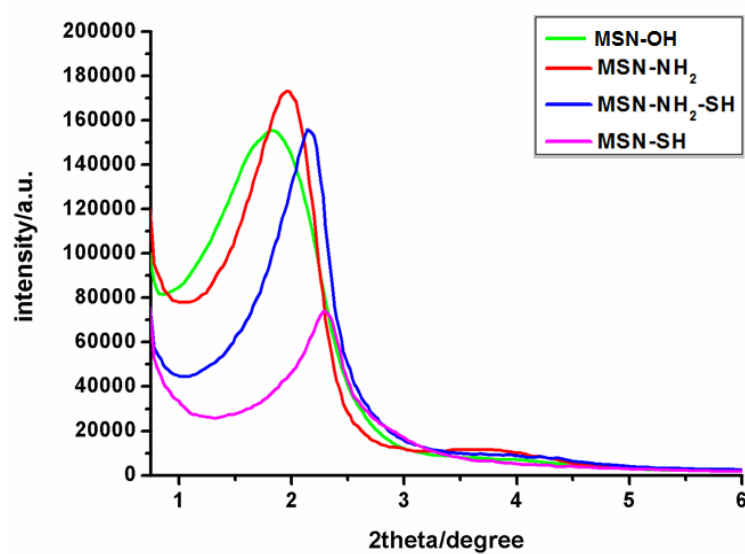

**Fig. S1.** The XRD patterns of MSNs with different surface groups.

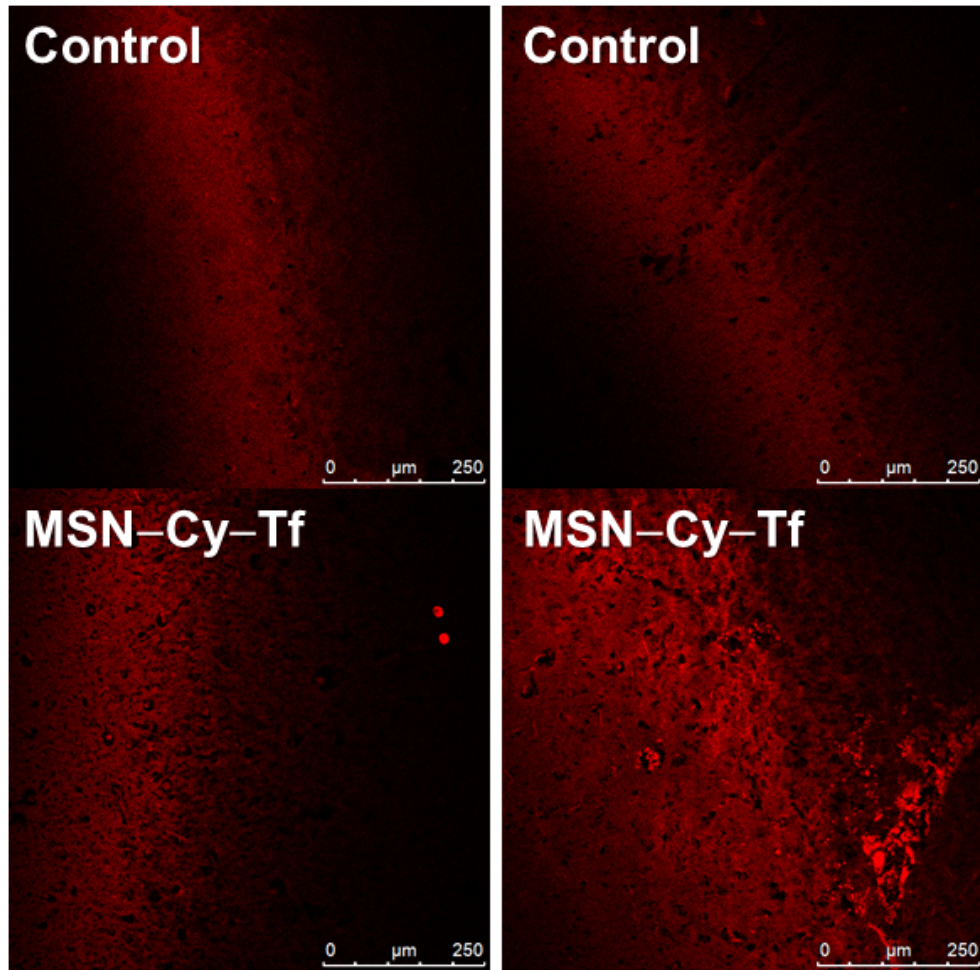

**Fig. S2.** The fluorescent images of superficial layer (left) and deeper layer (right) in brain tissue.

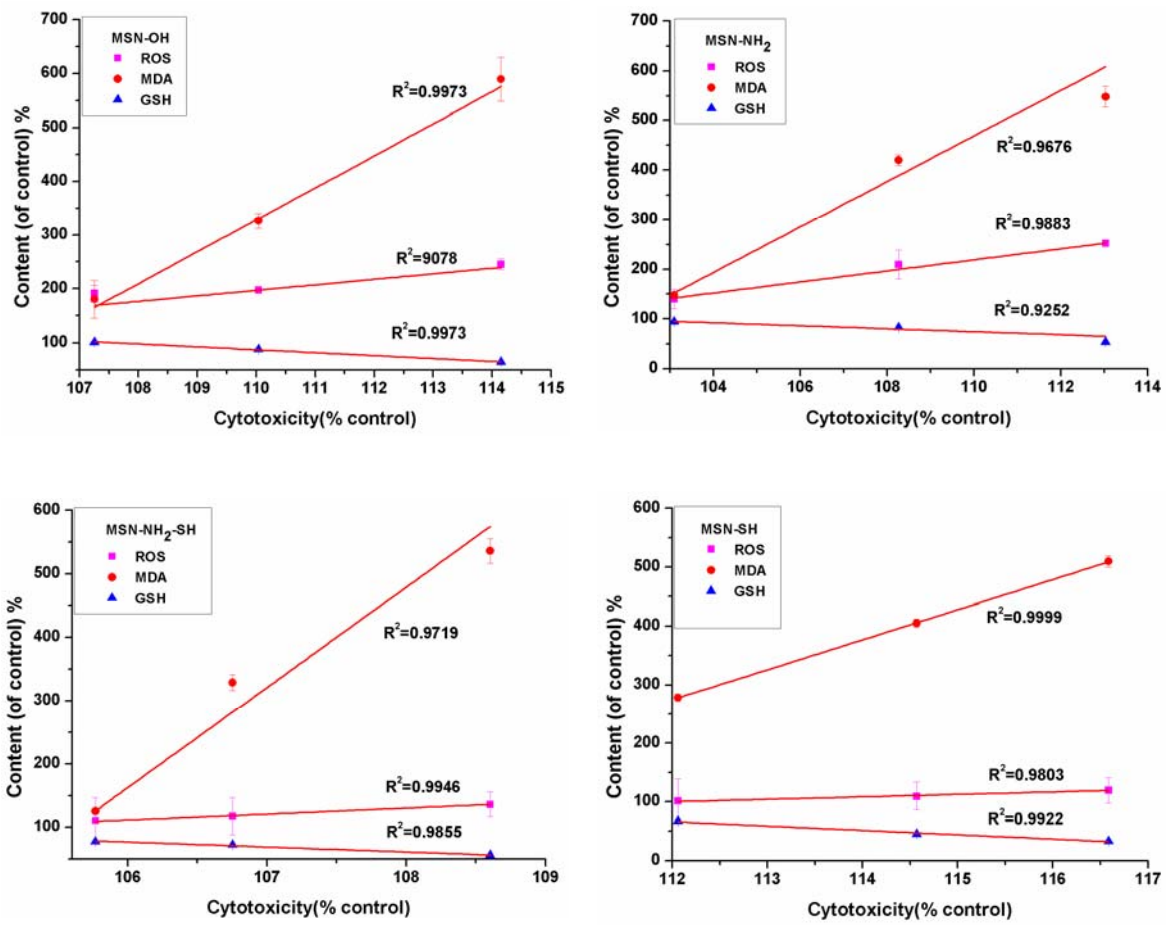

**Fig. S3.** Correlation between cytotoxicity and oxidative biomarkers in various surface modified silica nanoparticles at the designed concentrations tested for biomarkers measurement.
